# Supplementary material for: Heteroscedastic Reaction Norm Models Improve the Assessment of Genotype by Environment Interaction for Growth, Reproductive, and Visual Score Traits in Nellore Cattle
Source: MDPI journal article supplement (doi:10.3390/ani12192613), 2022-09-29
Supplement: s1 [file s1]

Table S1. Variance estimates and heritability for weaning and yearling traits in Nellore cattle according to the animal model used.

| Trait <sup>1</sup> | Model <sup>2</sup> | Variance components <sup>3</sup> |              |                  |              | $h_a^2$ (SE) <sup>3</sup> | AIC       |
|--------------------|--------------------|----------------------------------|--------------|------------------|--------------|---------------------------|-----------|
|                    |                    | $\sigma_a^2$                     | $\sigma_m^2$ | $\sigma_{mpe}^2$ | $\sigma_e^2$ |                           |           |
| BWG                | AM1                | 69.73                            | 50.63        | 60.57            | 192.15       | 0.19 (0.01)               | 3171952.9 |
|                    | AM2                | 69.73                            | 50.63        | 60.57            | 192.15       | 0.19 (0.01)               | 4712265.9 |
|                    | AM3                | 55.05                            | 114.09       | -                | 204.72       | 0.15 (0.00)               | 3173180.6 |
|                    | AM4                | 55.05                            | 114.09       | -                | 204.72       | 0.15 (0.00)               | 4713475.7 |
| WC                 | AM1                | 0.17                             | 0.10         | 0.14             | 0.67         | 0.16 (0.01)               | 32116.4   |
|                    | AM2                | 0.17                             | 0.10         | 0.14             | 0.67         | 0.16 (0.01)               | 1572418.2 |
|                    | AM3                | 0.14                             | 0.23         | -                | 0.70         | 0.13 (0.00)               | 33076.2   |
|                    | AM4                | 0.14                             | 0.23         | -                | 0.70         | 0.13 (0.00)               | 1573389.2 |
| WP                 | AM1                | 0.27                             | 0.07         | 0.14             | 0.75         | 0.22 (0.01)               | 103284.4  |
|                    | AM2                | 0.27                             | 0.07         | 0.14             | 0.75         | 0.22 (0.01)               | 1643597.3 |
|                    | AM3                | 0.24                             | 0.21         | -                | 0.79         | 0.19 (0.01)               | 104247.2  |
|                    | AM4                | 0.24                             | 0.21         | -                | 0.79         | 0.19 (0.00)               | 1644560.2 |
| WM                 | AM1                | 0.25                             | 0.08         | 0.17             | 0.78         | 0.19 (0.01)               | 127413.1  |
|                    | AM2                | 0.25                             | 0.08         | 0.17             | 0.78         | 0.19 (0.01)               | 1667726.0 |
|                    | AM3                | 0.21                             | 0.25         | -                | 0.83         | 0.16 (0.00)               | 128678.1  |
|                    | AM4                | 0.21                             | 0.25         | -                | 0.83         | 0.16 (0.00)               | 1668991.1 |
| YW                 | AM1                | 334.14                           | -            | -                | 386.27       | 0.46 (0.01)               | 4169122.0 |
|                    | AM2                | 334.14                           | -            | -                | 386.27       | 0.46 (0.01)               | 4169103.3 |
| WYG                | AM1                | 91.89                            | -            | -                | 287.42       | 0.24 (0.01)               | 3786419.3 |
|                    | AM2                | 91.89                            | -            | -                | 287.42       | 0.24 (0.01)               | 3786400.6 |
| YC                 | AM1                | 0.42                             | -            | -                | 0.68         | 0.38 (0.00)               | 1497742.2 |
|                    | AM2                | 0.42                             | -            | -                | 0.68         | 0.38 (0.00)               | 1497742.2 |
| YP                 | AM1                | 0.42                             | -            | -                | 0.78         | 0.35 (0.00)               | 1548505.4 |
|                    | AM2                | 0.42                             | -            | -                | 0.78         | 0.35 (0.00)               | 1548505.4 |
| YM                 | AM1                | 0.40                             | -            | -                | 0.83         | 0.33 (0.00)               | 1566460.1 |
|                    | AM2                | 0.40                             | -            | -                | 0.83         | 0.33 (0.00)               | 1566460.1 |
| SC                 | AM1                | 2.93                             | -            | -                | 3.88         | 0.43 (0.01)               | 2060626.9 |
|                    | AM2                | 2.93                             | -            | -                | 3.88         | 0.43 (0.01)               | 2060626.9 |
| AFC                | AM1                | 450                              | -            | -                | 6593.40      | 0.06 (0.01)               | 1606523.3 |
|                    | AM2                | 450                              | -            | -                | 6593.40      | 0.06 (0.01)               | 1606523.3 |

<sup>1</sup> BWG: birth-to-weaning weight gain; WC: conformation at weaning; WP: finishing precocity at weaning; WM: muscling at weaning; YW: yearling weight; WYG: weaning-to-yearling weight gain; YC: conformation at yearling; YP: finishing precocity at yearling; YM: muscling at yearling; SC: scrotal circumference; AFC: age at first calving.

<sup>2</sup> AM1: complete animal model; AM2: complete animal model with intercept; AM3: reduced animal model; AM4: reduced animal model with intercept.

<sup>3</sup>  $\sigma_a^2$ : direct additive genetic variance;  $\sigma_m^2$ : maternal genetic variance;  $\sigma_{mpe}^2$ : maternal permanent environmental variance;  $\sigma_e^2$ : residual variance;  $h_a^2$ : direct genetic heritability and standard error.

Table S2. Estimates of variance (diagonals), covariance (upper triangular; in italic) and correlation (lower triangular; in bold) among coefficients of reaction norm models (RNM) for the additive genetic effect of yearling visual score traits in Nellore cattle, with respective residual variance estimates, Akaike information criterion (AIC) and AIC weight (AICw).

| Traits <sup>1</sup> | Model <sup>2</sup> | Coefficient <sup>3</sup> | b0           | b1              | b2              | b3              | $\sigma_e^2$ <sup>4</sup> | np <sup>5</sup> | AIC       | AICw |
|---------------------|--------------------|--------------------------|--------------|-----------------|-----------------|-----------------|---------------------------|-----------------|-----------|------|
| YC                  | RNM_homo           | b0 (int)                 | 0.420        | <i>0.006795</i> |                 |                 | 0.67628                   | 4               | 1497720.7 | 0.37 |
|                     |                    | b1 (slp)                 | <b>0.40</b>  | 0.000693        |                 |                 |                           |                 |           |      |
|                     | RNM_hete           | b0 (int)                 | 0.41969      | 0.003068        |                 |                 | -0.39062                  | 5               | 1497719.7 | 0.61 |
|                     |                    | b1 (slp)                 | <b>0.21</b>  | 0.000501        |                 |                 | 0.010162                  |                 |           |      |
|                     | RNM_quad           | b0 (int)                 | 0.42242      | <i>0.003992</i> | <i>-0.00158</i> |                 | -0.38822                  | 9               | 1497729.6 | 0.00 |
|                     |                    | b1 (slp)                 | <b>0.21</b>  | 0.000826        | <i>-0.00033</i> |                 | 0.011917                  |                 |           |      |
|                     |                    | b2 (qdr)                 | <b>-0.18</b> | <b>-0.87</b>    | 0.000177        |                 | -0.00323                  |                 |           |      |
|                     | RNM_I-I            | b0 (int)                 | 0.4268       | <i>0.008974</i> | <i>-0.00964</i> |                 | -0.38835                  | 9               | 1497727.5 | 0.01 |
|                     |                    | b1 (slp1)                | <b>0.28</b>  | 0.002354        | <i>-0.00205</i> |                 | 0.014543                  |                 |           |      |
|                     |                    | b2 (slp2)                | <b>-0.34</b> | <b>-0.98</b>    | 0.001869        |                 | -0.00704                  |                 |           |      |
|                     | RNM_q-q            | b0 (int)                 | 0.42217      | <i>0.005997</i> | <i>0.000102</i> | <i>-0.0028</i>  | -0.38888                  | 14              | 1497741.7 | 0.00 |
|                     |                    | b1 (slp1)                | <b>0.20</b>  | 0.002168        | <i>0.000516</i> | <i>-0.00161</i> | 0.025113                  |                 |           |      |
|                     |                    | b2 (qdr1)                | <b>0.01</b>  | <b>0.53</b>     | 0.000443        | <i>-0.00081</i> | 0.007897                  |                 |           |      |
|                     |                    | b3 (qdr2)                | <b>-0.10</b> | <b>-0.82</b>    | <b>-0.91</b>    | 0.001771        | -0.01883                  |                 |           |      |
| YP                  | RNM_homo           | b0 (int)                 | 0.42027      | 0.0051          |                 |                 | 0.77593                   | 4               | 1548497   | 0.00 |
|                     |                    | b1 (slp)                 | <b>0.42</b>  | 0.000355        |                 |                 |                           |                 |           |      |
|                     | RNM_hete           | b0 (int)                 | 0.41948      | <i>0.000277</i> |                 |                 | -0.25297                  | 5               | 1548486   | 0.94 |
|                     |                    | b1 (slp)                 | <b>0.03</b>  | 0.000159        |                 |                 | 0.015137                  |                 |           |      |
|                     | RNM_quad           | b0 (int)                 | 0.42138      | <i>0.001076</i> | <i>-0.00124</i> |                 | -0.25175                  | 9               | 1548495   | 0.01 |
|                     |                    | b1 (slp)                 | <b>0.07</b>  | 0.000611        | <i>-0.00043</i> |                 | 0.016778                  |                 |           |      |
|                     |                    | b2 (qdr)                 | <b>-0.10</b> | <b>-0.95</b>    | 0.000339        |                 | -0.00223                  |                 |           |      |
|                     | RNM_I-I            | b0 (int)                 | 0.42252      | <i>0.003807</i> | <i>-0.00521</i> |                 | -0.24948                  | 9               | 1548492   | 0.04 |
|                     |                    | b1 (slp1)                | <b>0.09</b>  | 0.004167        | <i>-0.00504</i> |                 | 0.022849                  |                 |           |      |

|    |          |           |              |              |              |          |    |         |      |
|----|----------|-----------|--------------|--------------|--------------|----------|----|---------|------|
| YM | RNM_q-q  | b2 (slp2) | <b>-0.10</b> | <b>-1.00</b> | 0.006117     | -0.0115  | 14 | 1548500 | 0.00 |
|    |          | b0 (int)  | 0.42138      | 0.001679     | -0.00076     | -0.00085 |    |         |      |
|    |          | b1 (slp1) | <b>0.07</b>  | 0.001238     | 0.000996     | -0.00171 |    |         |      |
|    |          | b2 (qdr1) | <b>-0.03</b> | <b>0.67</b>  | 0.001804     | -0.0023  |    |         |      |
|    |          | b3 (qrd2) | <b>-0.02</b> | <b>-0.86</b> | <b>-0.96</b> | 0.003216 |    |         |      |
|    | RNM_homo | b0 (int)  | 0.399760     | 0.004048     |              | 0.828070 | 4  | 1566457 | 0.06 |
|    |          | b1 (slp)  | <b>0.37</b>  | 0.000294     |              |          |    |         |      |
|    | RNM_hete | b0 (int)  | 0.399400     | 0.000359     |              | -0.18850 | 5  | 1566451 | 0.90 |
|    |          | b1 (slp)  | <b>0.03</b>  | 0.000300     |              | 0.011283 |    |         |      |
|    | RNM_quad | b0 (int)  | 0.39964      | 0.000457     | -0.00033     | -0.18539 | 9  | 1566464 | 0.00 |
|    |          | b1 (slp)  | <b>0.03</b>  | 0.000525     | -0.00028     | 0.013520 |    |         |      |
|    |          | b2 (qdr)  | <b>-0.03</b> | <b>-0.7</b>  | 0.000309     | -0.00402 |    |         |      |
|    | RNM_l-l  | b0 (int)  | 0.401040     | 0.002687     | -0.00383     | -0.18217 | 9  | 1566458 | 0.04 |
|    |          | b1 (slp1) | <b>0.07</b>  | 0.004030     | -0.00558     | 0.022773 |    |         |      |
|    |          | b2 (slp2) | <b>-0.07</b> | <b>-0.97</b> | 0.008265     | -0.01866 |    |         |      |
|    | RNM_q-q  | b0 (int)  | 0.399440     | 0.007045     | 0.004644     | -0.00899 | 14 | 1566470 | 0.00 |
|    |          | b1 (slp1) | <b>0.3</b>   | 0.001350     | 0.001237     | -0.00146 |    |         |      |
|    |          | b2 (qdr1) | <b>0.16</b>  | <b>0.75</b>  | 0.002005     | -0.00210 |    |         |      |
|    |          | b3 (qrd2) | <b>-0.3</b>  | <b>-0.83</b> | <b>-0.98</b> | 0.002292 |    |         |      |

<sup>1</sup> YC: conformation at yearling; YP: finishing precocity at yearling; YM: muscling at yearling

<sup>2</sup> RNM\_homo: linear homoscedastic; RNM\_hete: linear heteroscedastic; RNM\_quad: quadratic heteroscedastic; RNM\_l-l: spline linear-linear heteroscedastic; RNM\_q-q: spline quadratic-quadratic heteroscedastic

<sup>3</sup> b0–b3 coefficients of the RNM for the additive genetic random effect [int: intercept; slp: slope; qdr: quadratic; slp1(2): slope segment 1(2); qdr1(2): quadratic segment 1(2)]

<sup>4</sup> Residual variance (RNM\_homo) or residual coefficients associated with parameters of heteroscedastic RNM that were modeled using a log-residual function [22].

<sup>5</sup> Number of estimated parameters

Table S3. Average (minimum and maximum) heritability estimates for weaning, yearling and reproductive traits in Nellore cattle for different reaction norm models.

| Trait <sup>1</sup> | Models <sup>2</sup> |                    |                    |                    |                    |
|--------------------|---------------------|--------------------|--------------------|--------------------|--------------------|
|                    | RNM_homo            | RNM_hete           | RNM_quad           | RNM_I-I            | RNM_q-q            |
| BWG                | 0.15 (0.14 - 0.18)  | 0.15 (0.15 - 0.16) | 0.15 (0.15 - 0.27) | 0.15 (0.15 - 0.19) | 0.15 (0.15 - 0.26) |
| WC                 | 0.13 (0.11 - 0.16)  | 0.13 (0.13 - 0.14) | 0.14 (0.13 - 0.28) | 0.14 (0.13 - 0.19) | 0.14 (0.13 - 0.28) |
| WP                 | 0.19 (0.18 - 0.20)  | 0.19 (0.19 - 0.20) | 0.20 (0.19 - 0.32) | 0.19 (0.19 - 0.24) | 0.20 (0.19 - 0.31) |
| WM                 | 0.16 (0.16 - 0.17)  | 0.16 (0.16 - 0.17) | 0.17 (0.16 - 0.29) | 0.17 (0.16 - 0.20) | 0.17 (0.16 - 0.29) |
| YW                 | 0.49 (0.34 - 0.70)  | 0.48 (0.47 - 0.55) | 0.49 (0.47 - 0.70) | 0.49 (0.47 - 0.63) | 0.49 (0.46 - 0.73) |
| WYG                | 0.30 (0.08 - 0.64)  | 0.25 (0.22 - 0.34) | 0.30 (0.25 - 0.71) | 0.26 (0.24 - 0.42) | 0.26 (0.22 - 0.51) |
| YC                 | 0.38 (0.36 - 0.41)  | 0.38 (0.38 - 0.39) | 0.38 (0.38 - 0.39) | 0.38 (0.38 - 0.39) | 0.38 (0.38 - 0.39) |
| YP                 | 0.35 (0.34 - 0.37)  | 0.35 (0.34 - 0.36) | 0.35 (0.34 - 0.38) | 0.35 (0.34 - 0.37) | 0.35 (0.34 - 0.39) |
| YM                 | 0.33 (0.31 - 0.34)  | 0.33 (0.32 - 0.33) | 0.33 (0.32 - 0.36) | 0.33 (0.32 - 0.35) | 0.33 (0.31 - 0.40) |
| SC                 | 0.45 (0.37 - 0.57)  | 0.45 (0.41 - 0.52) | 0.45 (0.41 - 0.63) | 0.45 (0.42- 0.61)  | 0.45 (0.42 - 0.55) |
| AFC                | 0.44 (0.01 - 0.87)  | 0.12 (0.05 - 0.15) | 0.09 (0.06 - 0.64) | 0.08 (0.07 - 0.20) | 0.09 (0.07 - 0.72) |

<sup>1</sup> BWG: birth-to-weaning weight gain; WC: conformation at weaning; WP: finishing precocity at weaning; WM: muscling at weaning; YW: yearling weight; WYG: weaning-to-yearling weight gain; YC: conformation at yearling; YP: finishing precocity at yearling; YM: muscling at yearling; SC: scrotal circumference; AFC: age at first calving.

<sup>2</sup> RNM\_homo: linear homoscedastic; RNM\_hete: linear heteroscedastic; RNM\_quad: quadratic heteroscedastic; RNM\_I-I: spline linear-linear heteroscedastic; RNM\_q-q: spline quadratic-quadratic heteroscedastic.
